# Supplementary material for: Community trust of government and non-governmental organizations during the 2014-16 Ebola epidemic in Liberia
Source: PubMed Central journal article supplement (PMC8824372; doi:10.1371/journal.pntd.0010083), 2022-01-27
Supplement: pntd.0010083.s002.pdf [file pntd.0010083.s002.pdf]

## S1 Table

**S1 Table. Social capital-related questions and answers for the sample population (n=1433).**

These questions were adapted for Liberian context from the social capital resource generator questions developed by Van der Gaag and Snijders [1].

| Do you know anyone who...                                  | % yes | If yes, access through... |        |               | “And yourself?” |
|------------------------------------------------------------|-------|---------------------------|--------|---------------|-----------------|
|                                                            |       | acquaintance              | friend | family member |                 |
| Can repair a car, bike, or other mechanical object         | 68    | 39                        | 34     | 27            | 5.9             |
| Owns a motorbike                                           | 83    | 25                        | 44     | 3             | 7.8             |
| Is handy repairing household equipment                     | 60    | 38                        | 34     | 29            | 9.6             |
| Can speak and write a foreign language                     | 37    | 33                        | 38     | 28            | 6.0             |
| Can work with a personal computer                          | 52    | 18                        | 44     | 39            | 9.1             |
| Can play an instrument                                     | 66    | 45                        | 35     | 20            | 9.1             |
| Has knowledge of literature                                | 23    | 36                        | 39     | 25            | 8.7             |
| Has senior high school education                           | 97    | 3.4                       | 17     | 79            | -               |
| Has higher than senior high school education               | 89    | 5.8                       | 20     | 74            | -               |
| Owns a television                                          | 75    | 15                        | 32     | 53            | 22              |
| Is active in a political party                             | 51    | 34                        | 40     | 26            | 18              |
| Works in the government                                    | 53    | 23                        | 24     | 53            | -               |
| Owns a business                                            | 89    | 17                        | 40     | 43            | 38              |
| Is sometimes in the opportunity to hire people             | 42    | 41                        | 34     | 24            | 13              |
| Knows a lot about governmental regulations                 | 33    | 31                        | 28     | 41            | 6.2             |
| Has good contacts with a newspaper, radio, or TV station   | 36    | 38                        | 42     | 21            | 6.8             |
| Knows about soccer                                         | 90    | 12                        | 44     | 45            | 35              |
| Has knowledge about financial matters (taxes, etc.)        | 32    | 26                        | 32     | 42            | 13              |
| Can find a temporary job for a family member               | 34    | 23                        | 29     | 48            | -               |
| Can give advice concerning conflict with others            | 94    | 9.3                       | 22     | 6.9           | -               |
| Can help with lifting, packing, or heavy work              | 64    | 25                        | 39     | 36            | -               |
| Can go to the market for you when you are ill              | 95    | 1.6                       | 25     | 74            | -               |
| Can give medical advice if you need it                     | 70    | 16                        | 33     | 52            | -               |
| Can lend you a large sum of money                          | 24    | 12                        | 40     | 48            | -               |
| Can provide a place to stay for a week                     | 84    | 1.7                       | 23     | 75            | -               |
| Can give advice concerning a conflict with family          | 97    | 4.8                       | 20     | 76            | -               |
| Can discuss what political party you are going to vote for | 55    | 29                        | 43     | 28            | -               |
| Can give advice on matters of law                          | 39    | 26                        | 33     | 41            | -               |
| Can give a reference if you are looking for work           | 41    | 20                        | 38     | 42            | -               |
| You can pay social visits too                              | 92    | 0.8                       | 45     | 54            | -               |
| Can discuss intimate matters with you                      | 92    | 0.8                       | 47     | 52            | -               |
| Can do small jobs around the house                         | 80    | 12                        | 20     | 68            | -               |
| Owns a smartphone                                          | 82    | 4.2                       | 26     | 70            | -               |

## References

1. M. Van Der Gaag and T. A. Snijders, “The resource generator: social capital quantification with concrete items,” *Social Networks*, vol. 27, no. 1, pp. 1–29, 2005.
