# Supplementary material for: Community trust of government and non-governmental organizations during the 2014-16 Ebola epidemic in Liberia
Source: PubMed Central journal article supplement (PMC8824372; doi:10.1371/journal.pntd.0010083), 2022-01-27
Supplement: pntd.0010083.s003.pdf [file pntd.0010083.s003.pdf]

## S2 Table

**S2 Table. Generalized linear model regression coefficient estimates** for trust in government and trust in iNGOs as dependent variables in time period 3 using an ordinal regression model (as in Fig 3). Some independent variables were dropped via AIC stepwise reduction from one or both models. A negative coefficient indicates a negative association with trust, while a positive coefficient indicates a positive association with trust. Community descriptions: Careysburg = rural, low exposure; Tubmanburg = urban, high incidence.

| Independent variable      | Government |         |         | iNGO  |         |         |
|---------------------------|------------|---------|---------|-------|---------|---------|
|                           | Value      | Std Err | t value | Value | Std Err | t value |
| Careysburg                | 0.29       | 0.13    | 2.15    | 0.42  | 0.14    | 2.92    |
| Tubmanburg                | 0.74       | 0.14    | 5.44    | 1.20  | 0.16    | 7.55    |
| Knew someone infected     | -0.25      | 0.11    | -2.26   | -0.28 | 0.13    | -2.23   |
| Belief in Ebola           | 0.71       | 0.16    | 4.59    | 0.62  | 0.17    | 3.70    |
| Age                       | -0.11      | 0.05    | -2.09   | -     | -       | -       |
| Frequent witness of Ebola | -          | -       | -       | 0.26  | 0.13    | 1.96    |
| Social capital            | -0.15      | 0.06    | -2.71   | -0.19 | 0.06    | -3.03   |
| Ebola knowledge           | 0.15       | 0.05    | 2.92    | 0.30  | 0.06    | 5.20    |
| Highly mobile             | -0.21      | 0.11    | -1.94   | -     | -       | -       |
